# Supplementary material for: Perfluorotetradecanoic Acid (PFTeDA) Induces Mitochondrial Damage and Oxidative Stress in Zebrafish (Danio rerio) Embryos/Larvae
Source: MDPI journal article supplement (doi:10.3390/toxics10120776), 2022-12-12
Supplement: s1 [file s1]

## **SUPPLEMENTAL DATA**

# **Perfluorotetradecanoic acid (PFTeDA) Induces Mitochondrial Damage and Oxidative Stress in Zebrafish (*Danio rerio*) Embryos/Larvae**

Neep Patel<sup>1</sup>, Emma Ivantsova<sup>1</sup>, Isaac Konig<sup>2</sup>, Christopher L. Souders II<sup>1</sup>, Christopher J. Martyniuk<sup>1,3\*</sup>

<sup>1</sup>Center for Environmental and Human Toxicology, Department of Physiological Sciences, College of Veterinary Medicine, University of Florida, Gainesville, Florida, 32611, USA

<sup>2</sup>Department of Chemistry, Federal University of Lavras (UFLA), Lavras, Brazil 37200-900

<sup>3</sup>UF Genetics Institute, Interdisciplinary Program in Biomedical Sciences, Neuroscience

\*Corresponding author: Christopher J. Martyniuk  
Center for Environmental and Human Toxicology &  
Department of Physiological Sciences  
College of Veterinary Medicine, University of Florida  
2187 Mowry Rd. Bldg 471 PO Box 110885  
Gainesville, FL 32611  
email: cmartyn@ufl.edu

Supplemental Table S1. Primers used in this study.

| Supplemental Table 1. Primers used for real-time PCR analysis.        |             |                           |                            |                                |
|-----------------------------------------------------------------------|-------------|---------------------------|----------------------------|--------------------------------|
| Gene name                                                             | Gene Symbol | Forward (5' to 3')        | Reverse (5' to 3')         | Reference                      |
| ATP synthase F0 subunit 6                                             | atp06       | TTATCCTCGTTGCCATACTTC     | AGTTGGTTTGTGAATCGTCC       | Jin et al., 2010               |
| beta-actin                                                            | bactin      | CGAGCAGGAGATGGGAACC       | CAACGGAAACGCTCATTGC        | Wang et al. 2018               |
| catalase                                                              | cat         | CTCCTGATGTGGCCCGATAC      | TCAGATGCCCCGGCCATATTC      | Sarkar et al., 2014            |
| MT-CO1 (mitochondrially encoded cytochrome c oxidase I)               | cox1        | ACTTAGCCAACCAGGAGCAC      | GGGTGGAAGAAGTCAGAAGC       | Northam and LeMoine, 2019      |
| cytochrome c oxidase subunit 5a                                       | cox5a1      | AAGCATAGATGTCTACGATTGTGAG | AGGCCAATTAAATAGAACACAAACAC | Duggan et al., (2011)          |
| cytochrome c oxidase IV                                               | cox-iv      | CAAGTTTGTGCAGCAGCTG       | CAAAGAAGAAGATTCCTGCAAC     | Northam and LeMoine, 2019      |
| cytochrome c1                                                         | cyc1        | ACTTAGCCAACCAGGAGCAC      | GGGTGGAAGAAGTCAGAAGC       | McClelland et al. 2006         |
| heat shock protein 70                                                 | hsp70       | GAAGACGGCATCTTTGAGGTGA    | GGGCCCTCTTGTCTGACTGAT      | Hahn et al., 2014              |
| heat shock protein 90a                                                | hsp90a      | AGCTGGCGGATCGTTCACTGTC    | AAAACTCGCCGTACTCCTCATTGG   | Murtha and Keller et al., 2003 |
| mitochondrially Encoded NADH:Ubiquinone Oxidoreductase Core Subunit 1 | mt-nd1      | AGCCATCTCAAGCCTAGCAG      | ATTGTTTGCCTACAGCTCG        | AC024175.3                     |
| mitochondrially Encoded NADH:Ubiquinone Oxidoreductase Core Subunit 2 | mt-nd2      | GACCTACCAGCCACAGCTAC      | TTGGGTCGTTTGTACCCGTC       | AC024175.3                     |

|                                                                                |                  |                       |                        |                     |
|--------------------------------------------------------------------------------|------------------|-----------------------|------------------------|---------------------|
| mitochondrially Encoded<br>NADH:Ubiquinone<br>Oxidoreductase Core Subunit<br>3 | mt-nd3           | ACCACTCCCATGAGGAGATCA | CTTGGGCTCATTTCGTAGGCT  | AC024175.3          |
| ribosomal 18s                                                                  | rps18            | CGGAGGTTCGAAGACGATCA  | TCGCTAGTTGGCATCGTTTATG | Wang et al. 2018    |
| superoxide dismutase 1                                                         | sod1 (Cu/Zn SOD) | CAACACAAACGGCTGCATCA  | TTTGCAACACCACTGGCATC   | Sarkar et al., 2014 |
| superoxide dismutase 2                                                         | sod2 (Mn SOD)    | AGCGTGACTTTGGCTCATTT  | ATGAGACCTGTGGTCCCTTG   | Sarkar et al., 2014 |

Duggan AT, Kocha KM, Monk CT, Bremer K, Moyes CD. Coordination of cytochrome c oxidase gene expression in the remodelling of skeletal muscle. *J Exp Biol.* 2011 Jun 1;214(Pt 11):1880-7. doi: 10.1242/jeb.053322. PMID: 21562175.

Hahn, M.E., McArthur, A.G., Karchner, S.I., Franks, D.G., Jenny, M.J., Timme-Laragy, A.R., Stegeman, J.J., Woodin, B.R., Cipriano, M.J. and Linney, E., 2014. The transcriptional response to oxidative stress during vertebrate development: effects of tert-butylhydroquinone and 2, 3, 7, 8-tetrachlorodibenzo-p-dioxin. *PloS one*, 9(11), p.e113158.

Jin, Y., Zhang, X., Shu, L., Chen, L., Sun, L., Qian, H., Liu, W. and Fu, Z., 2010. Oxidative stress response and gene expression with atrazine exposure in adult female zebrafish (*Danio rerio*). *Chemosphere*, 78(7), pp.846-852.

McClelland, G.B., Craig, P.M., Dhekney, K. and Dipardo, S., 2006. Temperature-and exercise-induced gene expression and metabolic enzyme changes in skeletal muscle of adult zebrafish (*Danio rerio*). *The Journal of Physiology*, 577(2), pp.739-751.

Murtha JM, Keller ET. Characterization of the heat shock response in mature zebrafish (*Danio rerio*). *Exp Gerontol.* 2003 Jun;38(6):683-91. doi: 10.1016/s0531-5565(03)00067-6. PMID: 12814804.

Northam, C. and LeMoine, C.M., 2019. Metabolic regulation by the PGC-1 $\alpha$  and PGC-1 $\beta$  coactivators in larval zebrafish (*Danio rerio*). *Comparative Biochemistry and Physiology Part A: Molecular & Integrative Physiology*, 234, pp.60-67.

Sarkar, S., Mukherjee, S., Chattopadhyay, A. and Bhattacharya, S., 2014. Low dose of arsenic trioxide triggers oxidative stress in zebrafish brain: expression of antioxidant genes. *Ecotoxicology and environmental safety*, 107, pp.1-8.

Wang, X.H., Souders 2nd, C.L., Zhao, Y.H., Martyniuk, C.J. 2018. Paraquat affects mitochondrial bioenergetics, dopamine system expression, and locomotor activity in zebrafish (*Danio rerio*). *Chemosphere*. 191, 106-117.

**A**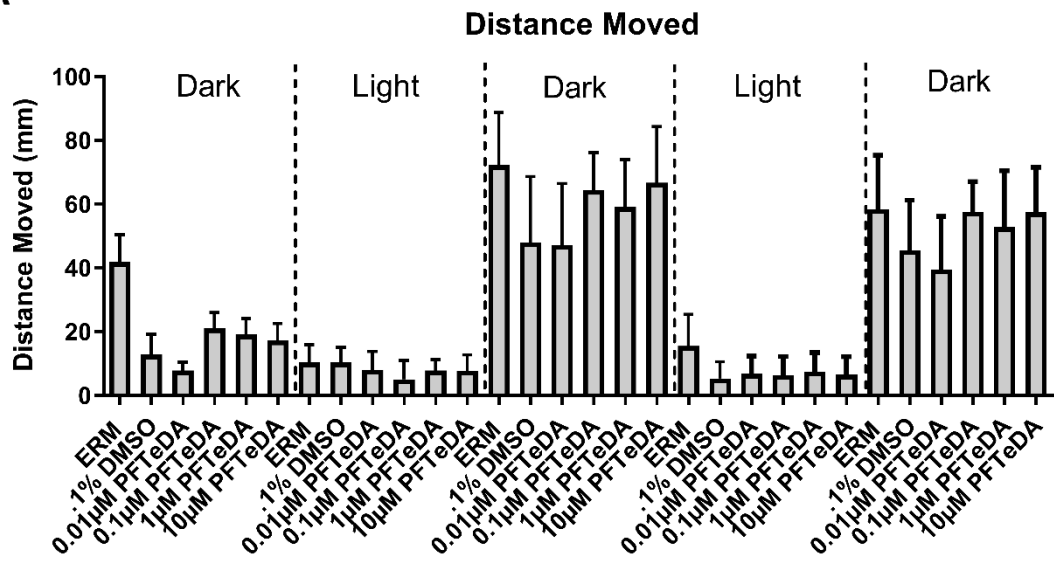**B**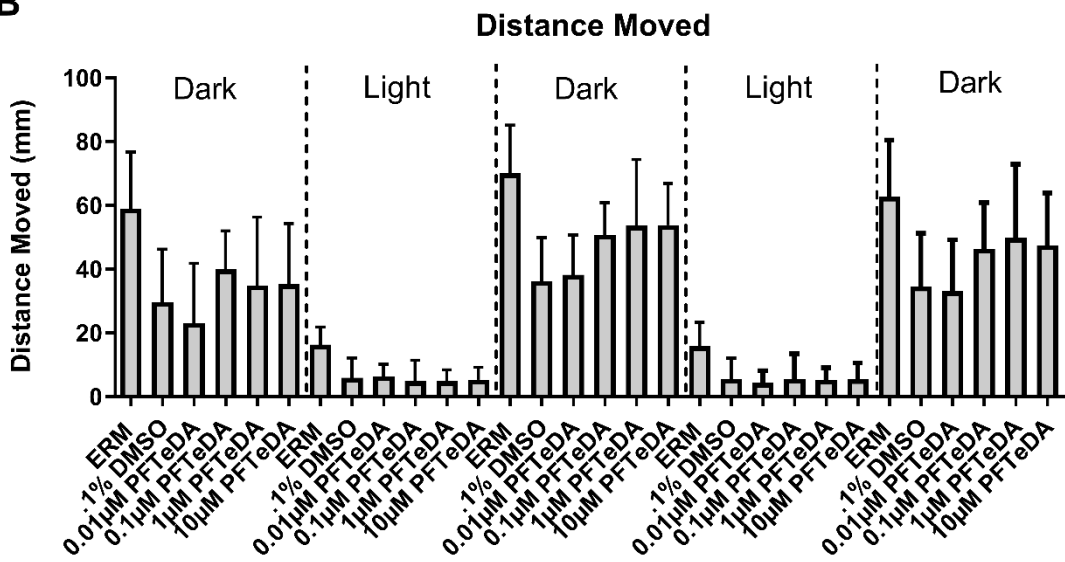**C**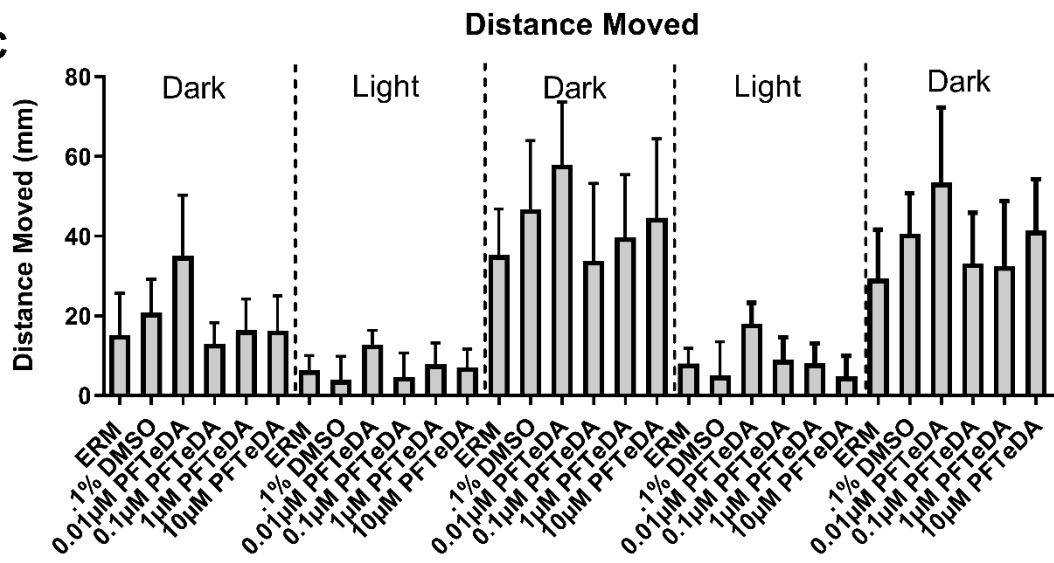

**D**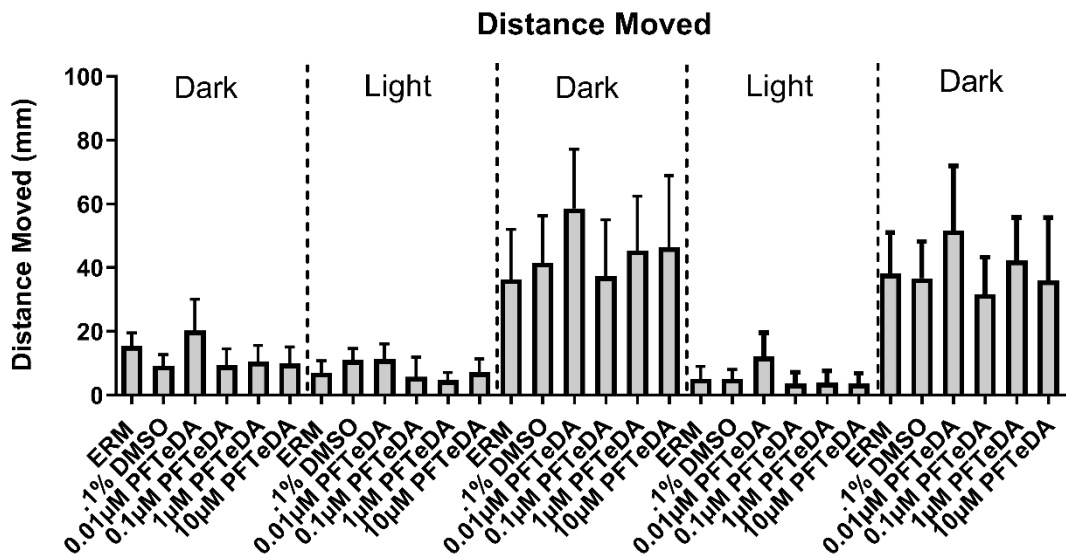**E**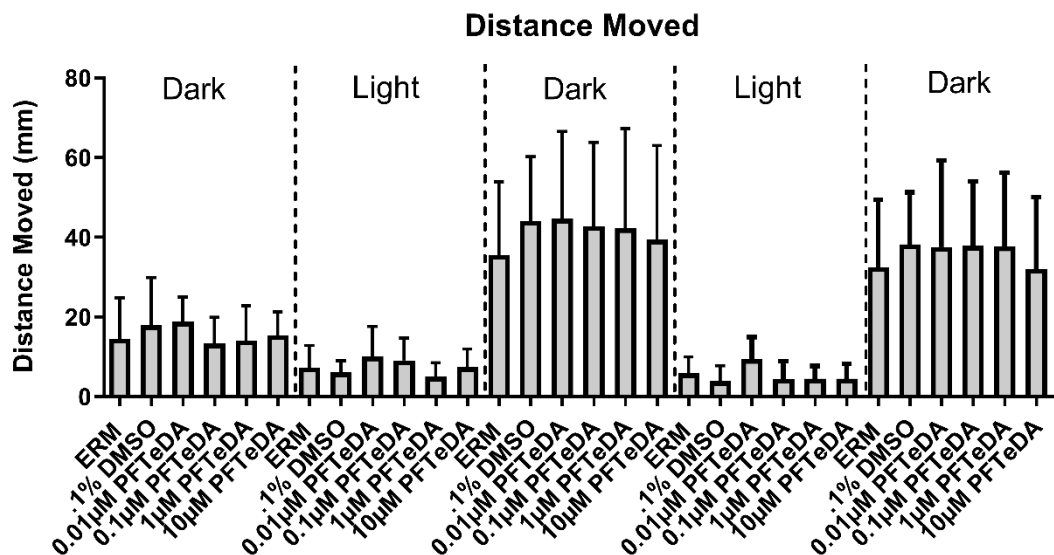

**Supplemental Figure S1.** The activity of 7-day zebrafish larvae exposed to ERM, 0.1% DMSO, or different concentrations of PFTeDA (0.01, 0.1, 1, or 10 µM). Mean values are depicted by the columns in each dark-light phase (mean ± S.D.) (One-Way ANOVA with a Holm-Šídák's multiple comparisons test, n=16/treatment/experiment).
